# Supplementary material for: Short- and Long-Term Outcome of Laparoscopic- versus Robotic-Assisted Right Colectomy: A Systematic Review and Meta-Analysis
Source: MDPI journal article supplement (doi:10.3390/jcm11092387), 2022-04-24
Supplement: s1 [file s1]

**Supplement Table S1:** Pathological Staging and Information about adjuvant treatment of studies with a long-term follow up:

| Author        |         | TNM: <i>n</i> (%) |     |   |        |       |        |        |        |        |    |   |    |   |    | UICC: <i>n</i> (%) |   |        |        |        |        |        |        |        |      | Adjuvant Treatment |        |
|---------------|---------|-------------------|-----|---|--------|-------|--------|--------|--------|--------|----|---|----|---|----|--------------------|---|--------|--------|--------|--------|--------|--------|--------|------|--------------------|--------|
|               | LRC (n) | RRC (n)           | Tis |   | T1     |       | T2     |        | T3     |        | T4 |   | N0 |   | N+ |                    | 0 | I      |        | II     |        | III    |        | IV     |      |                    |        |
| Ferri [13]    | 35      | 35                | -   | - | 7(20)  | 9(26) | 18(51) | 17(49) | 7(20)  | 6(17)  | -  | - | -  | - | -  | -                  | - | -      | -      | -      | -      | -      | -      | -      | -    | n/a                | n/a    |
| Park [7, 11]  | 35      | 35                | -   | - | 10(29) | 9(26) | 16(17) | 16(46) | 9(26)  | 10(29) | *  | * | -  | - | -  | -                  | - | -      | -      | -      | -      | -      | -      | -      | -    | 23(66)             | 21(60) |
| Spinoglio [8] | 100     | 100               | -   | - | -      | -     | -      | -      | -      | -      | -  | - | -  | - | -  | -                  | - | 26(26) | 21(21) | 28(28) | 38(38) | 33(33) | 37(37) | 13(13) | 4(4) | n/a                | n/a    |
| Kang [33]     | 43      | 20                | -   | - | 7(16)  | 5(25) | 16(37) | 7(35)  | 20(47) | 8(40)  | -  | - | -  | - | -  | -                  | - | -      | -      | -      | -      | -      | -      | -      | -    | n/a                | n/a    |

Values are given in absolute numbers or percentages. Abbreviations: n/a = not available, SD = Standard deviation, f = female, m = male.

Gray: Laparoscopic resections. White: Robotic resections.

\*T4 tumors were not included in this study [7,11].

Supplement Table S2A: Pathological TNM Staging if available:

| Author          | TNM: <i>n</i> (%) |            |        |        |        |        |         |        |          |         |         |        |          |         |          |         |
|-----------------|-------------------|------------|--------|--------|--------|--------|---------|--------|----------|---------|---------|--------|----------|---------|----------|---------|
|                 | LRC<br>(n)        | RRC<br>(n) | Tis    |        | T1     |        | T2      |        | T3       |         | T4      |        | N0       |         | N+       |         |
| Yozgatli [15]   | 61                | 35         | 3(5)   | 2(6)   | 7(11)  | 5(14)  | 20(33)  | 13(20) | 29(45)   | 12(34)  | 3(5)    | 2(6)   | -        | -       | -        | -       |
| Ferri [13]      | 35                | 35         | -      | -      | 7(20)  | 9(26)  | 18(51)  | 17(49) | 7(20)    | 6(17)   | -       | -      | -        | -       | -        | -       |
| Park [7, 11]    | 35                | 35         | -      | -      | 10(29) | 9(26)  | 16(46)  | 16(46) | 9(26)    | 10(26)  | *       | *      | -        | -       | -        | -       |
| Spinoglio [8]   | 100               | 100        | -      | -      | -      | -      | -       | -      | -        | -       | -       | -      | -        | -       | -        | -       |
| Migliore [14]   | 170               | 46         | 2(1)   | 1(2)   | 17(10) | 6(13)  | 31(18)  | 5(11)  | 87(51)   | 26(57)  | 26(15)  | 5(11)  | 111(65)  | 24(52)  | 52(31)   | 19(41)  |
| Hannan [17]     | 35                | 35         | -      | -      | 5(14)  | 5(14)  | 8(23)   | 1(3)   | 11(31)   | 11(31)  | 4(11)   | 3(9)   | -        | -       | -        | -       |
| Tagliabue [18]  | 68                | 55         | 13(19) | 14(25) | 11(16) | 16(29) | 21(31)  | 14(25) | 22(32)   | 10(18)  | 1(1)    | 1(2)   | -        | -       | -        | -       |
| Dohrn [10]      | 3621              | 381        | 6(0.1) | 1(0.2) | 304(8) | 38(10) | 574(16) | 78(20) | 2077(57) | 194(51) | 598(17) | 64(17) | 2281(63) | 251(66) | 1281(35) | 125(33) |
| Merola [16]     | 94                | 94         | -      | -      | 13(14) | 10(11) | 56(60)  | 52(55) | 23(24)   | 31(33)  | 3(3)    | 2(2)   | -        | -       | -        | -       |
| Ahmadi [36]     | 42                | 59         | 7(17)  | 16(27) | 4(10)  | 8(14)  | 3(7)    | 5(8)   | 19(45)   | 20(34)  | 5(12)   | 8(14)  | 23(55)   | 43(73)  | 14(33)   | 16(27)  |
| Ngu [20]        | 16                | 16         | 0      | 1(6)   | 1(6)   | 0(0)   | 2(13)   | 1(6)   | 9(56)    | 10(62)  | 3(19)   | 2(13)  | 9(56)    | 7(44)   | 6(38)    | 7(44)   |
| Sorgato [21]    | 40                | 48         | 2(5)   | 7(15)  | 9(23)  | 18(38) | 14(35)  | 11(23) | 9(23)    | 10(21)  | 6(15)   | 2(4)   | -        | -       | -        | -       |
| Widmar [19]     | 207               | 69         | -      | -      | -      | -      | -       | -      | -        | -       | -       | -      | -        | -       | -        | -       |
| Gerbaud [22]    | 59                | 42         | -      | -      | -      | -      | -       | -      | -        | -       | -       | -      | -        | -       | -        | -       |
| Mégevand [23]   | 50                | 50         | -      | -      | -      | -      | -       | -      | -        | -       | -       | -      | -        | -       | -        | -       |
| Trastulli [24]  | 134               | 102        | 7(5)   | 7(7)   | 33(25) | 23(23) | 36(27)  | 26(25) | 36(27)   | 30(30)  | 8(6)    | 2(2)   | -        | -       | -        | -       |
| Ceccarelli [25] | 29                | 26         | 5(17)  | 2(8)   | 4(14)  | 1(4)   | 2(7)    | 6(23)  | 17(59)   | 11(42)  | 1(3)    | 6(23)  | 23(7)    | 17(65)  | 6(21)    | 9(35)   |
| De Angelis [26] | 50                | 30         | -      | -      | 18(36) | 8(27)  | 21(42)  | 13(43) | 11(22)   | 9(30)   | -       | -      | -        | -       | -        | -       |
| Deutsch [27]    | 47                | 18         | 1(2)   | 0(0)   | 13(28) | 3(17)  | 6(13)   | 1(6)   | 4(9)     | 1(6)    | -       | -      | -        | -       | -        | -       |
| Haskins [28]    | 2405              | 89         | -      | -      | -      | -      | -       | -      | -        | -       | -       | -      | -        | -       | -        | -       |
| Rawlings [30]   | 15                | 17         | -      | -      | -      | -      | -       | -      | -        | -       | -       | -      | -        | -       | -        | -       |
| deSouza [31]    | 135               | 40         | 6(4)   | 1(3)   | 16(12) | 3(8)   | 14(10)  | 7(18)  | 19(14)   | 4(10)   | 11(8)   | 3(8)   | 49(36)   | 14(35)  | 17(13)   | 4(10)   |
| Casillas [32]   | 110               | 52         | -      | -      | -      | -      | -       | -      | -        | -       | -       | -      | -        | -       | -        | -       |
| Kang [33]       | 43                | 20         | -      | -      | 7(16)  | 5(25)  | 16(37)  | 7(35)  | 20(47)   | 8(40)   | -       | -      | -        | -       | -        | -       |
| Dolejs [34]     | 6521              | 259        | -      | -      | -      | -      | -       | -      | -        | -       | -       | -      | -        | -       | -        | -       |
| Lujan [35]      | 135               | 89         | 6(4)   | 6(7)   | 28(21) | 14(16) | 22(16)  | 10(11) | 19(14)   | 13(14)  | 6(4)    | 3(3)   | -        | -       | -        | -       |

Values are given in absolute numbers and percentage.

Gray: Laparoscopic resections. White: Robotic resections.

\*T4 was an exclusion criterion in this study.

**Supplement Table S2B:** Pathological UICC Staging if available:

| Author          | UICC: <i>n</i> (%) |         |        |        |         |        |          |         |          |         |        |       |
|-----------------|--------------------|---------|--------|--------|---------|--------|----------|---------|----------|---------|--------|-------|
|                 | LRC (n)            | RRC (n) | 0      |        | I       |        | II       |         | III      |         | IV     |       |
| Yozgatli [15]   | 61                 | 35      | -      | -      | -       | -      | -        | -       | -        | -       | -      | -     |
| Ferri [13]      | 35                 | 35      | -      | -      | -       | -      | -        | -       | -        | -       | -      | -     |
| Park [7, 11]    | 35                 | 35      | -      | -      | -       | -      | -        | -       | -        | -       | -      | -     |
| Spinoglio [8]   | 100                | 100     | -      | -      | 26(26)  | 21(21) | 28(28)   | 38(38)  | 33(33)   | 37(37)  | 13(13) | 4(4)  |
| Migliore [14]   | 170                | 46      | -      | -      | -       | -      | -        | -       | -        | -       | -      | -     |
| Hannan [17]     | 35                 | 35      | -      | -      | -       | -      | -        | -       | -        | -       | -      | -     |
| Tagliabue [18]  | 68                 | 55      | -      | -      | -       | -      | -        | -       | -        | -       | -      | -     |
| Dohrn [10]      | 3621               | 381     | 5(0.1) | 1(0.2) | 745(21) | 89(23) | 1435(40) | 143(38) | 1114(31) | 109(29) | 228(6) | 33(9) |
| Merola [16]     | 94                 | 94      | -      | -      | -       | -      | -        | -       | -        | -       | -      | -     |
| Ahmadi [36]     | 42                 | 59      | -      | -      | -       | -      | -        | -       | -        | -       | -      | -     |
| Ngu [20]        | 16                 | 16      | -      | -      | -       | -      | -        | -       | -        | -       | -      | -     |
| Sorgato [21]    | 40                 | 48      | -      | -      | -       | -      | -        | -       | -        | -       | -      | -     |
| Widmar [19]     | 207                | 69      | -      | -      | -       | -      | -        | -       | -        | -       | -      | -     |
| Gerbaud [22]    | 59                 | 42      | -      | -      | -       | -      | -        | -       | -        | -       | -      | -     |
| Mégevand [23]   | 50                 | 50      | 15(30) | 9(18)  | 7(14)   | 10(20) | 9(18)    | 16(32)  | 16(32)   | 12(24)  | 3(6)   | 3(6)  |
| Trastulli [24]  | 134                | 102     | -      | -      | -       | -      | -        | -       | -        | -       | -      | -     |
| Ceccarelli [25] | 29                 | 26      | -      | -      | -       | -      | -        | -       | -        | -       | -      | -     |
| De Angelis [26] | 50                 | 30      | -      | -      | -       | -      | -        | -       | -        | -       | -      | -     |
| Deutsch [27]    | 47                 | 18      | -      | -      | -       | -      | -        | -       | -        | -       | -      | -     |
| Haskins [28]    | 2405               | 89      | -      | -      | -       | -      | -        | -       | -        | -       | -      | -     |
| Rawlings [30]   | 15                 | 17      | -      | -      | -       | -      | -        | -       | -        | -       | -      | -     |
| deSouza [31]    | 135                | 40      | -      | -      | -       | -      | -        | -       | -        | -       | -      | -     |
| Casillas [32]   | 110                | 52      | -      | -      | -       | -      | -        | -       | -        | -       | -      | -     |
| Kang [33]       | 43                 | 20      | -      | -      | -       | -      | -        | -       | -        | -       | -      | -     |
| Dolejs [34]     | 6521               | 259     | -      | -      | -       | -      | -        | -       | -        | -       | -      | -     |
| Lujan [35]      | 135                | 89      | -      | -      | -       | -      | -        | -       | -        | -       | -      | -     |

Values are given in absolute numbers and percentage.

Gray: Laparoscopic resections. White: Robotic resections.

**Supplement Table S3:** Meta-analysis of perioperative Outcome of included studies:

| Variable          | LRC           | RRC            | OR/MD                  | <i>p</i> -Value | I <sup>2</sup> | References          |
|-------------------|---------------|----------------|------------------------|-----------------|----------------|---------------------|
| Surgery costs (€) | 3.900 ± 1.677 | 8.156 ± 0.458  | -4.16 [-7.12 - -1.21]* | <b>0.006</b>    | 93%            | [16, 33]            |
| Total costs (€)   | 7.647 ± 1.307 | 10.306 ± 1.507 | -2.66 [-5.17 - -0.15]* | <b>0.04</b>     | 96%            | [7, 11, 16, 30, 33] |

Values are given in mean ±SD or in absolute numbers. Abbreviations: OR: Odds ratio, MD: Mean difference, d: days, ml: milliliter, min: minutes.

\*x1000€.
